# Supplementary material for: Pectinmethylesterases (PME) and Pectinmethylesterase Inhibitors (PMEI) Enriched during Phloem Fiber Development in Flax (Linum usitatissimum)
Source: PLoS One. 2014 Aug 14;9(8):e105386. doi: 10.1371/journal.pone.0105386 (PMC4133374; doi:10.1371/journal.pone.0105386)
Supplement: Table S3 — Tukey’s multiple comparisons test of dCT expression values between whole stem tissues. An ANOVA test was followed by a Tukey’s multiple comparisons test using GraphPad Prism version 6.00 for Windows The asterisks denote the p-value as follows. *0.01–0.05; **0.001–0.01, ***0.0001–0.001; ****<0.0001. ns: non-significant difference (p>0.05). np: no pattern. (XLSX) [file pone.0105386.s007.xlsx]

## Sheet: Sheet1
Group	Gene	SA vs. 1-2	SA vs. 2-3	SA vs. 3-4	SA vs. A	SA vs. B	SA vs. C	SA vs. D	SA vs. E	1-2 vs. 2-3	1-2 vs. 3-4	1-2 vs. A	1-2 vs. B	1-2 vs. C	1-2 vs. D	1-2 vs. E	2-3 vs. 3-4	2-3 vs. A	2-3 vs. B	2-3 vs. C	2-3 vs. D	2-3 vs. E	3-4 vs. A	3-4 vs. B	3-4 vs. C	3-4 vs. D	3-4 vs. E	A vs. B	A vs. C	A vs. D	A vs. E	B vs. C	B vs. D	B vs. E	C vs. D	C vs. E	D vs. E
1	LuPME7	ns	ns	ns	*	**	**	**	***	ns	ns	ns	ns	ns	ns	ns	ns	ns	ns	ns	ns	ns	ns	ns	ns	ns	ns	ns	ns	ns	ns	ns	ns	ns	ns	ns	ns
1	LuPME10	ns	****	****	***	**	***	****	****	**	ns	ns	ns	ns	*	***	ns	ns	ns	ns	ns	ns	ns	ns	ns	ns	ns	ns	ns	ns	ns	ns	ns	ns	ns	ns	ns
1	LuPME28	ns	ns	ns	ns	**	**	***	*	ns	ns	ns	**	**	***	*	ns	ns	ns	ns	ns	ns	ns	ns	ns	ns	ns	ns	ns	ns	ns	ns	ns	ns	ns	ns	ns
1	LuPME67	ns	ns	**	ns	ns	ns	ns	ns	ns	ns	ns	**	***	*	****	ns	ns	***	***	**	****	ns	****	****	****	****	*	*	ns	****	ns	ns	ns	ns	ns	ns
1	LuPME71	ns	ns	ns	ns	ns	ns	ns	**	ns	ns	ns	ns	ns	ns	**	ns	ns	ns	ns	ns	ns	ns	ns	ns	ns	ns	ns	ns	ns	ns	ns	ns	ns	ns	ns	**
1	LuPME73	ns	ns	ns	ns	ns	ns	ns	*	ns	ns	ns	ns	ns	ns	ns	ns	ns	ns	ns	ns	ns	ns	ns	ns	ns	ns	ns	ns	ns	ns	***	ns	***	ns	ns	ns
1	LuPME79	ns	ns	ns	ns	****	****	****	****	ns	ns	ns	****	****	****	****	ns	ns	****	****	****	****	ns	****	****	****	****	****	****	****	****	ns	ns	ns	ns	ns	ns
1	LuPME102	ns	ns	ns	ns	*	*	ns	****	ns	ns	ns	ns	ns	ns	ns	ns	ns	ns	ns	ns	ns	ns	ns	ns	ns	ns	ns	ns	ns	ns	ns	ns	ns	ns	ns	ns
1	LuPME105	ns	****	****	****	****	***	****	****	****	****	****	****	****	****	****	ns	ns	ns	ns	ns	ns	ns	ns	ns	ns	ns	ns	ns	ns	ns	ns	ns	ns	**	ns	ns
1	LuPMEI45	ns	****	***	*	**	****	ns	****	**	ns	ns	ns	****	ns	***	ns	ns	ns	ns	ns	ns	ns	ns	ns	ns	ns	ns	*	ns	ns	ns	ns	ns	**	ns	*
1	LuPMEI59	ns	ns	ns	ns	ns	ns	*	*	ns	ns	ns	ns	ns	*	*	ns	*	ns	**	ns	ns	ns	ns	ns	ns	ns	ns	ns	**	**	ns	ns	ns	***	**	ns
1	LuPMEI65	ns	ns	ns	**	****	****	****	****	ns	ns	****	****	****	****	****	ns	ns	****	****	****	****	ns	****	****	****	****	***	ns	***	****	ns	ns	ns	ns	ns	ns
2	LuPME1	ns	ns	ns	****	**	ns	ns	****	ns	ns	****	*	ns	ns	****	***	****	****	**	**	****	****	ns	ns	ns	*	****	****	****	*	ns	ns	ns	ns	**	**
2	LuPME30	ns	ns	***	****	ns	ns	ns	ns	ns	*	****	ns	ns	ns	ns	ns	***	ns	ns	ns	*	ns	ns	***	****	****	**	****	****	****	ns	ns	**	ns	ns	ns
2	LuPME45	ns	*	****	****	***	**	ns	ns	ns	****	****	ns	ns	ns	ns	***	****	ns	ns	ns	ns	*	*	*	****	****	****	****	****	****	ns	ns	ns	ns	ns	ns
2	LuPME46	ns	ns	ns	ns	ns	ns	ns	ns	ns	ns	ns	ns	ns	ns	ns	ns	ns	ns	ns	ns	ns	ns	ns	ns	ns	ns	ns	ns	*	ns	ns	ns	ns	ns	ns	ns
2	LuPME61	*	ns	****	****	****	****	****	****	ns	****	****	****	****	****	**	****	****	****	****	****	****	**	*	ns	ns	ns	ns	ns	**	****	ns	*	***	ns	ns	ns
2	LuPME85	ns	**	****	****	****	**	ns	ns	ns	****	****	****	ns	ns	ns	****	****	*	ns	*	ns	ns	**	****	****	****	****	****	****	****	*	****	***	*	ns	ns
2	LuPME96	***	ns	ns	**	ns	ns	ns	ns	****	ns	ns	***	***	ns	*	*	****	ns	ns	**	ns	ns	ns	ns	ns	ns	**	***	ns	*	ns	ns	ns	ns	ns	ns
2	LuPMEI73	*	***	****	****	****	****	***	****	ns	*	****	ns	**	ns	**	ns	****	ns	ns	ns	ns	ns	ns	ns	ns	ns	**	ns	***	ns	ns	ns	ns	ns	ns	ns
3	LuPME3	*	*	*	***	*	ns	ns	***	ns	ns	ns	ns	ns	ns	ns	ns	ns	ns	ns	ns	ns	ns	ns	ns	ns	ns	ns	ns	ns	ns	ns	ns	ns	ns	ns	ns
3	LuPME31	***	ns	ns	****	**	**	****	****	*	ns	ns	ns	ns	ns	ns	ns	****	ns	ns	***	***	***	ns	ns	*	*	ns	*	ns	ns	ns	ns	ns	ns	ns	ns
3	LuPMEI27	ns	ns	ns	*	*	ns	*	ns	ns	ns	ns	ns	ns	ns	ns	ns	*	*	*	*	ns	ns	ns	ns	ns	ns	ns	ns	ns	ns	ns	ns	ns	ns	ns	ns
3	LuPMEI44	ns	ns	ns	***	ns	*	ns	ns	ns	ns	***	ns	ns	ns	ns	ns	***	ns	ns	ns	ns	ns	ns	ns	ns	ns	ns	ns	ns	ns	ns	ns	ns	ns	ns	ns
3	LuPMEI67	ns	ns	ns	ns	ns	ns	ns	ns	ns	ns	ns	ns	ns	ns	ns	ns	ns	ns	ns	ns	ns	ns	ns	ns	ns	ns	ns	ns	ns	ns	ns	ns	ns	ns	ns	ns
4	LuPMEI60	ns	ns	ns	ns	ns	ns	ns	ns	ns	ns	ns	ns	ns	ns	ns	ns	ns	ns	ns	ns	ns	ns	ns	ns	ns	ns	ns	ns	ns	ns	ns	ns	ns	ns	ns	ns
5	LuPMEI66	***	****	****	****	***	*	ns	ns	ns	ns	**	ns	ns	***	**	ns	ns	ns	**	****	****	ns	ns	***	****	****	**	****	****	****	ns	**	**	ns	ns	ns
np	LUPME5	ns	ns	ns	ns	ns	*	ns	ns	**	ns	ns	**	***	**	**	ns	ns	ns	ns	ns	ns	ns	ns	ns	ns	ns	ns	ns	ns	ns	ns	ns	ns	ns	ns	ns
np	LUPME11	ns	ns	ns	ns	ns	ns	ns	ns	ns	ns	ns	ns	ns	ns	**	ns	ns	ns	ns	ns	*	ns	ns	ns	ns	*	ns	ns	ns	*	ns	ns	**	ns	ns	ns
np	LUPME92	ns	ns	ns	ns	ns	ns	ns	*	**	ns	ns	ns	ns	ns	***	ns	ns	**	*	**	ns	ns	ns	ns	ns	ns	ns	ns	ns	ns	ns	ns	***	ns	**	***
